# Supplementary material for: Case Studies of Aerosol Pollution in Different Public Transport Vehicles in Hungarian Cities
Source: MDPI journal article supplement (doi:10.3390/atmos13050692), 2022-04-26
Supplement: s1 [file s1]

# Case studies of aerosol pollution in different public transport vehicles in Hungarian cities -Supplementary material

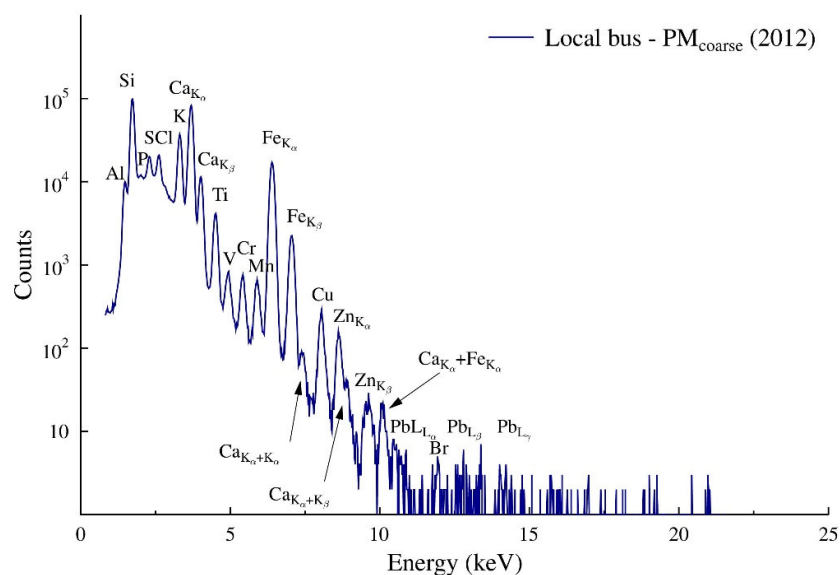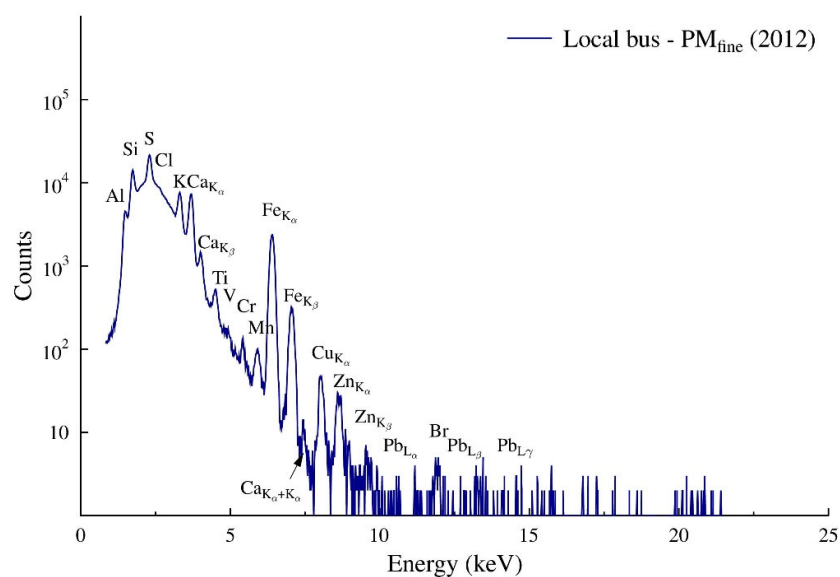

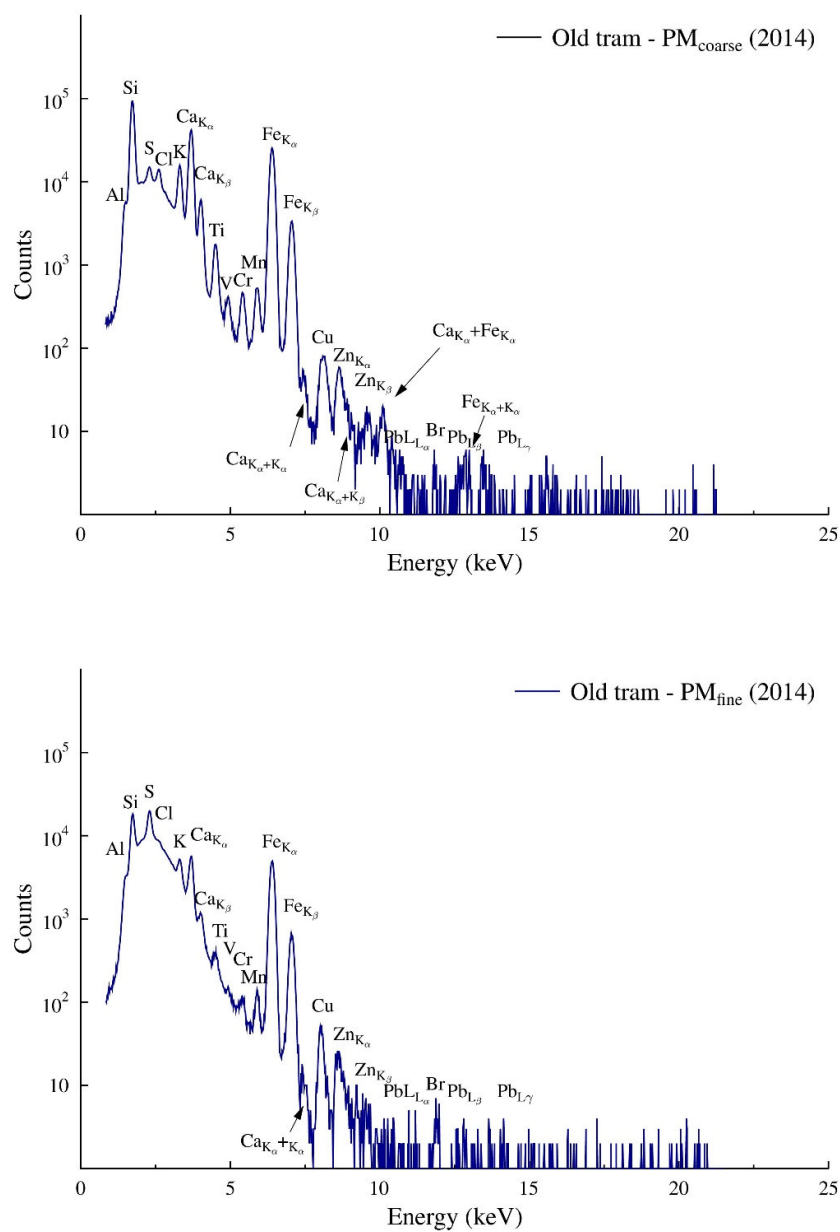

**Figure S1.** PM<sub>coarse</sub> and PM<sub>fine</sub> PIXE spectra from different years and different transport vehicles.

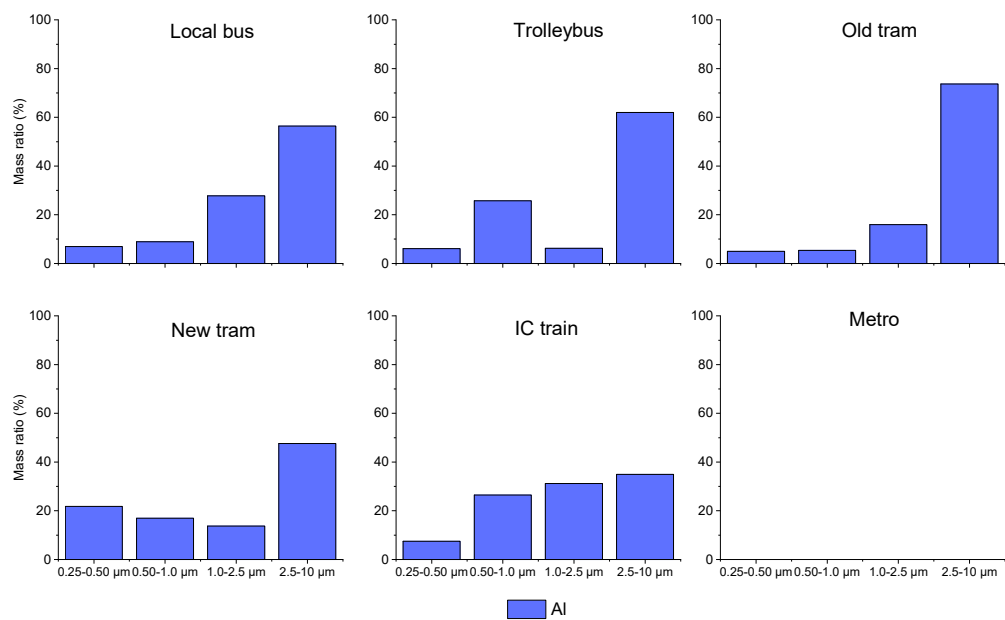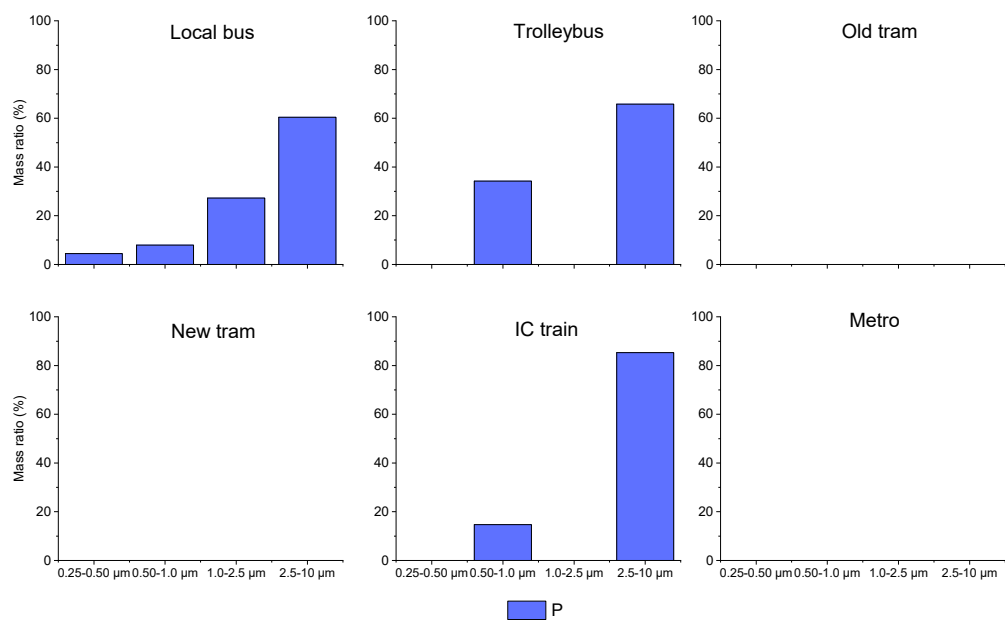

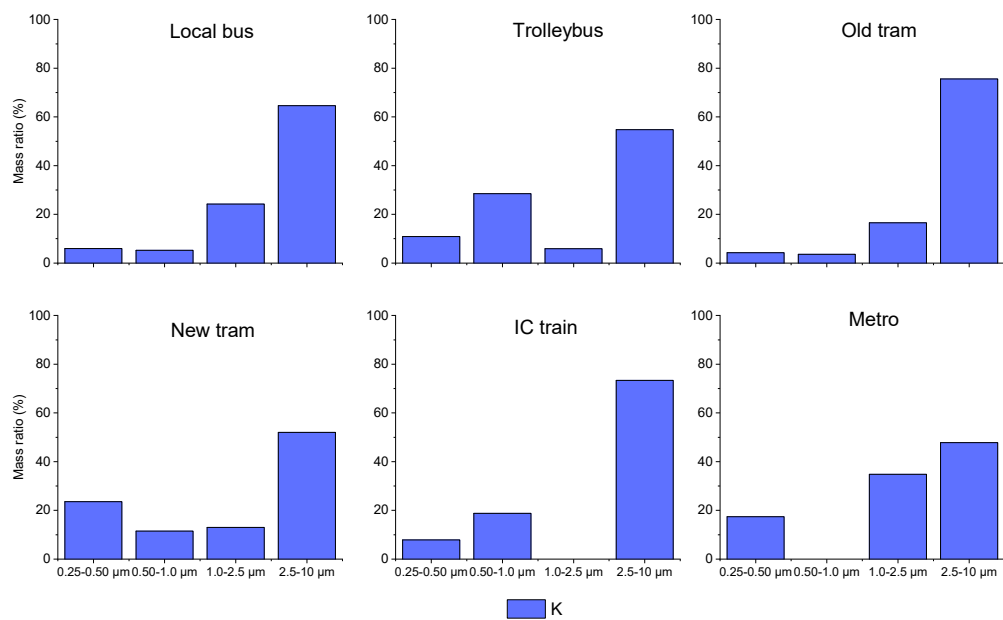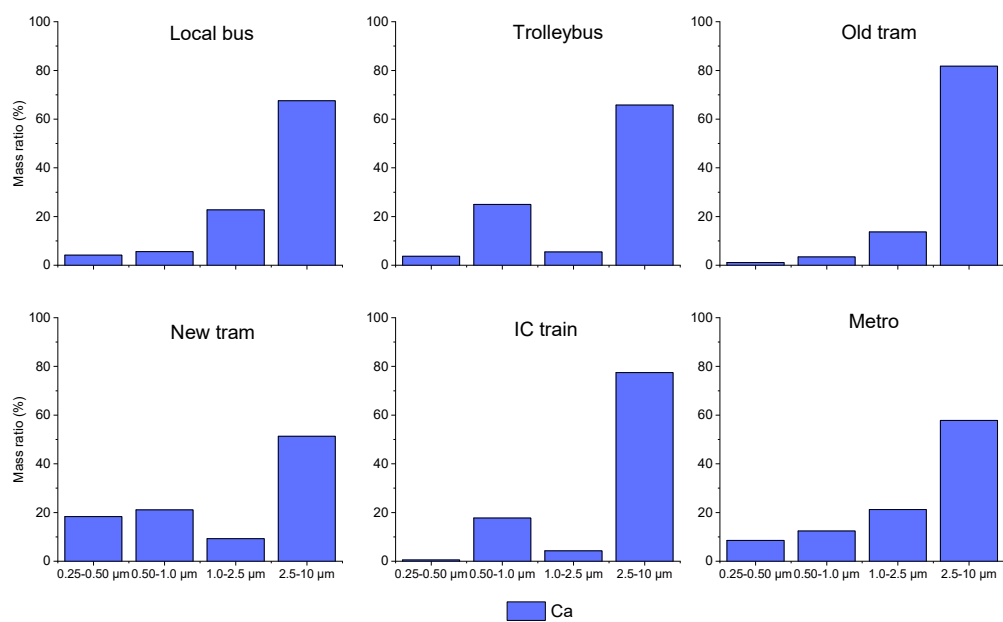

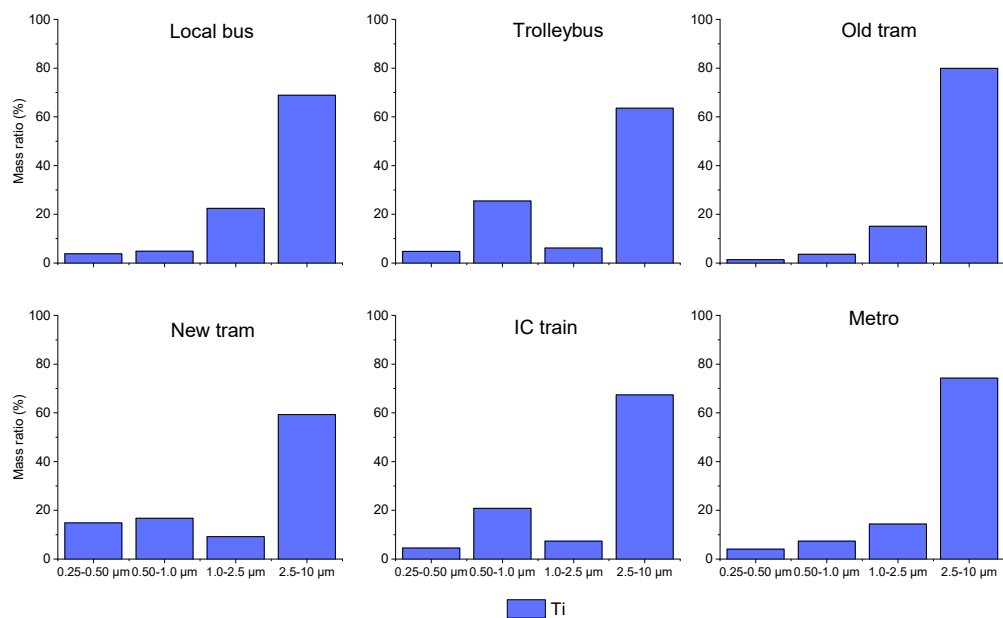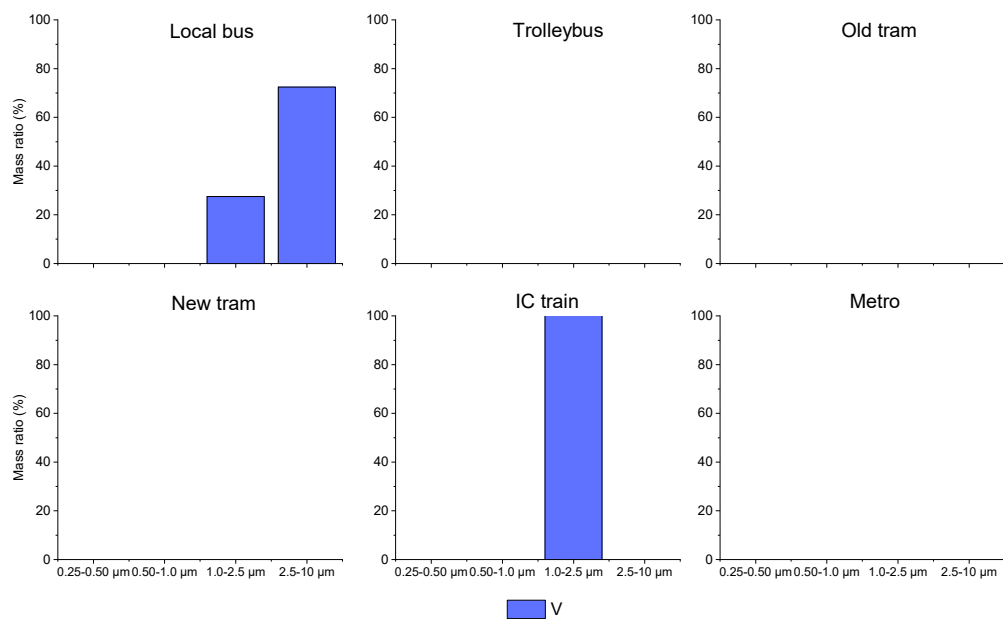

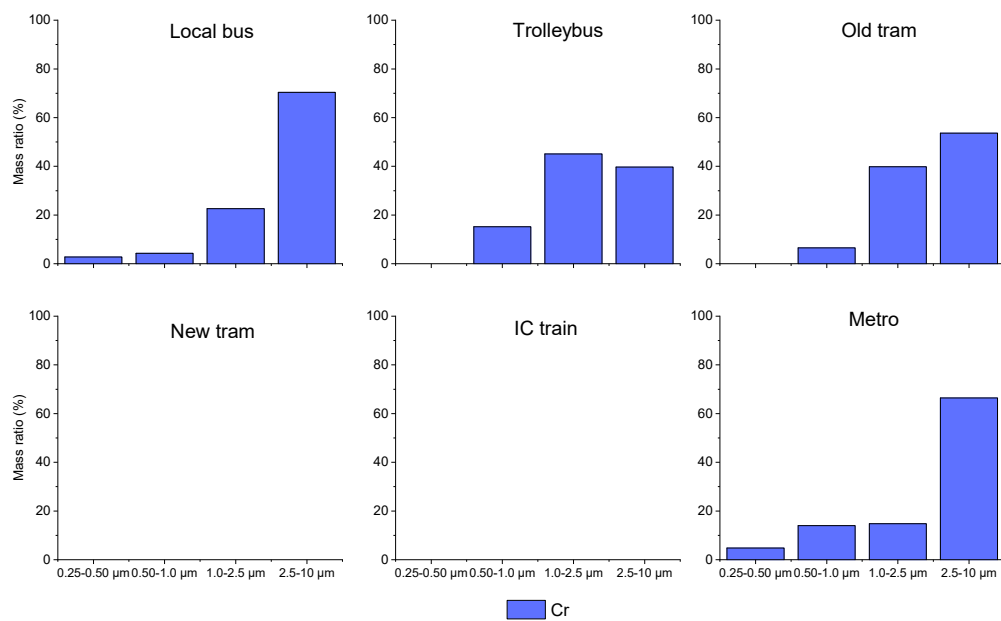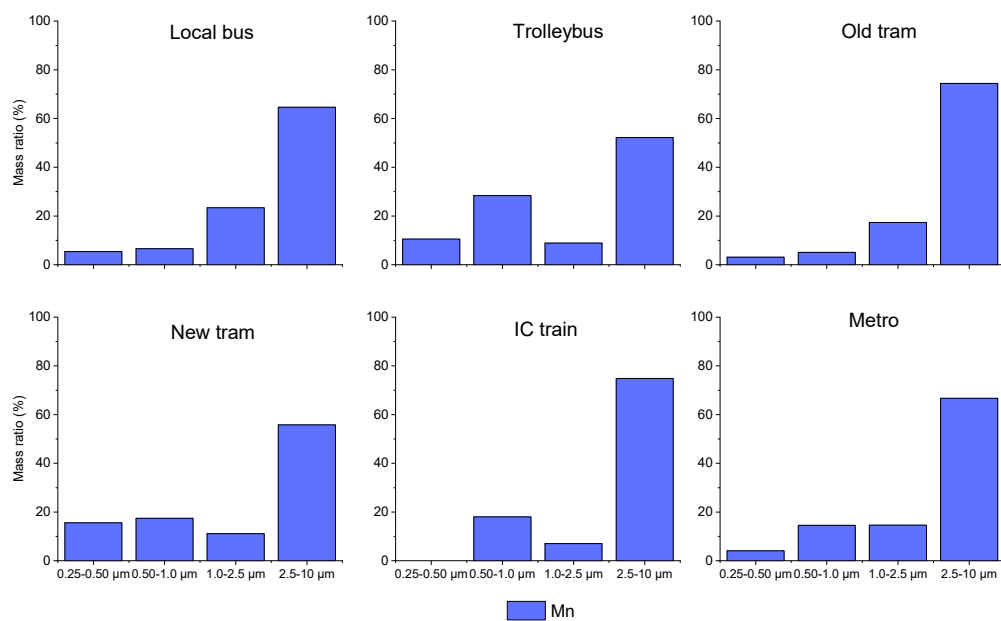

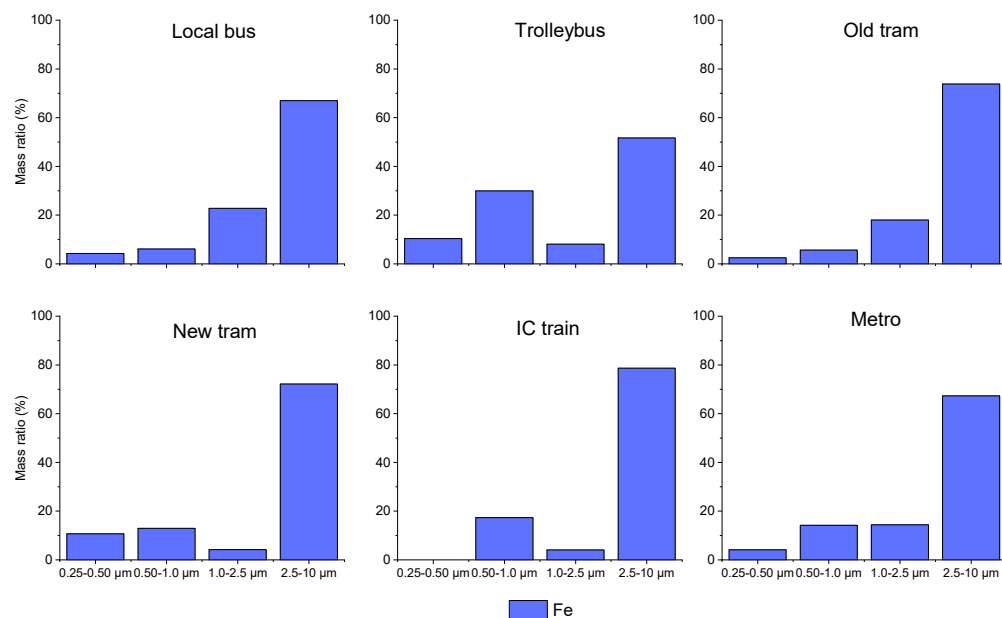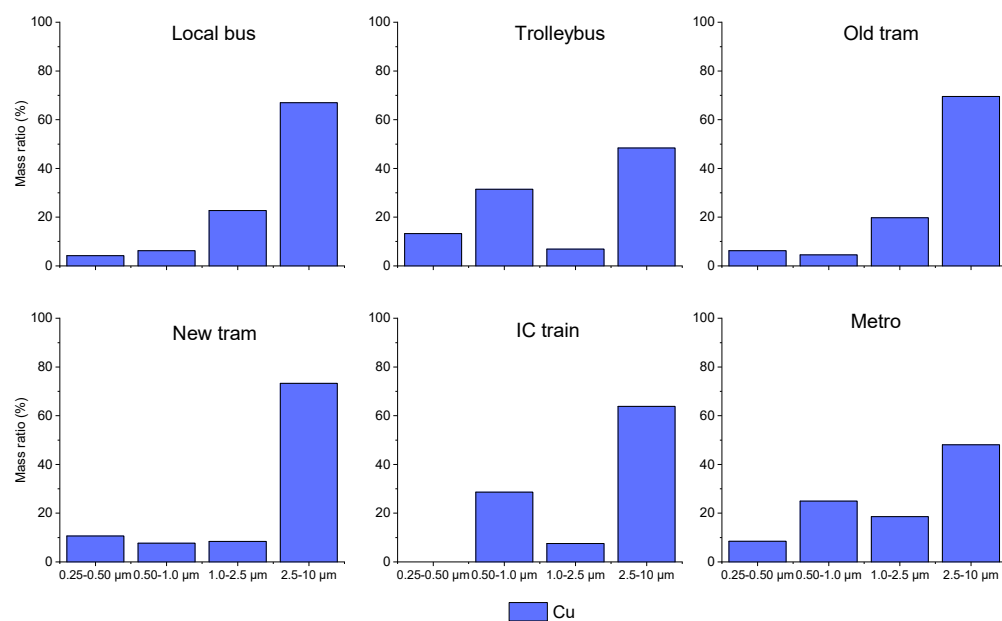

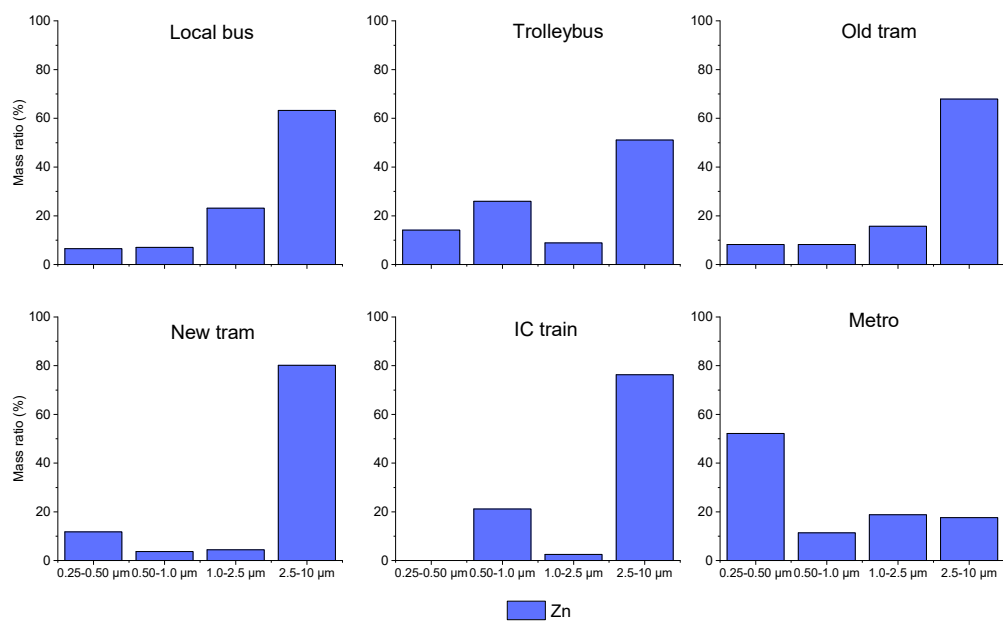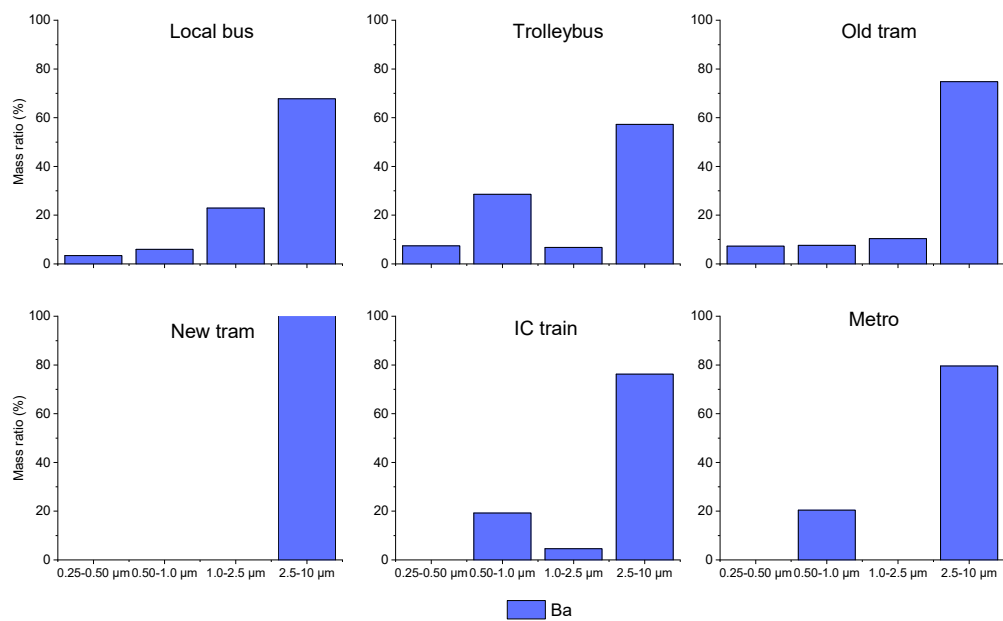



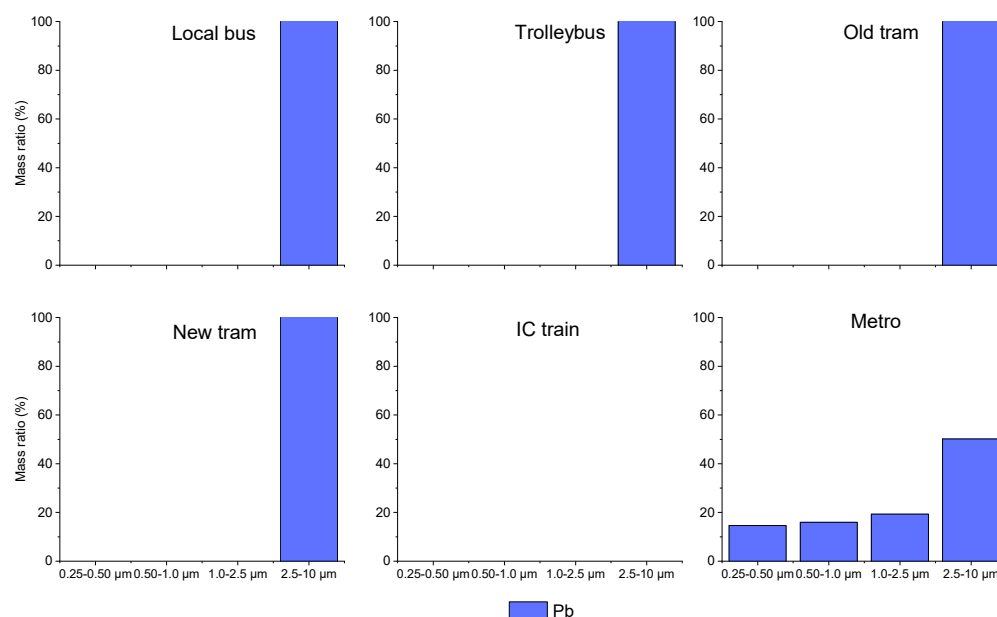

**Figure S2.** Mass size distributions for each element in different vehicles in 2014.

**Table S1.** The detection limit and the error of the analytes.

| Aerosol constituent  | MDL (ng m <sup>-3</sup> ) | Analitical uncertainty (%) | Method     |
|----------------------|---------------------------|----------------------------|------------|
| PM <sub>2.5</sub>    | 1000                      | 5                          | Gravimetry |
| PM <sub>coarse</sub> | 1000                      | 5                          | Gravimetry |
| Al                   | 5.04                      | 10                         | PIXE       |
| Si                   | 2.48                      | 5                          | PIXE       |
| P                    | 0.94                      | 10                         | PIXE       |
| S                    | 1.32                      | 3                          | PIXE       |
| Cl                   | 0.77                      | 3                          | PIXE       |
| K                    | 0.58                      | 3                          | PIXE       |
| Ca                   | 0.89                      | 3                          | PIXE       |
| Ti                   | 0.32                      | 5                          | PIXE       |
| V                    | 0.35                      | 8                          | PIXE       |
| Cr                   | 0.27                      | 8                          | PIXE       |
| Mn                   | 0.34                      | 5                          | PIXE       |
| Fe                   | 0.96                      | 3                          | PIXE       |
| Co                   | 0.42                      | 10                         | PIXE       |
| Ni                   | 0.18                      | 10                         | PIXE       |
| Cu                   | 0.21                      | 3                          | PIXE       |
| Zn                   | 0.25                      | 3                          | PIXE       |
| As                   | 0.71                      | 8                          | PIXE       |
| Br                   | 0.61                      | 8                          | PIXE       |
| Sr                   | 1.16                      | 10                         | PIXE       |
| Ba                   | 1.65                      | 10                         | PIXE       |
| Pb                   | 0.92                      | 8                          | PIXE       |

**Table S2.** Comparison of mean PM<sub>10</sub> and PM<sub>2.5</sub> concentrations inside in railway and metro microenvironments.

| City        | Location                  | PM <sub>10</sub> (µg m <sup>-3</sup> )* | PM <sub>2.5</sub> (µg m <sup>-3</sup> ) |
|-------------|---------------------------|-----------------------------------------|-----------------------------------------|
| Debrecen    | IC-train (2012)           | 373                                     | 19                                      |
|             | IC-train (2014)           | 248                                     | 66                                      |
|             | Metro (2014)              | 477                                     | 189                                     |
| Budapest    | Metro- in platform (2007) | 155                                     | -                                       |
| Rome        | Metro (2006)              | 407                                     | -                                       |
| London      | Metro (2018)              | -                                       | 800                                     |
| Stockholm   | Metro (2000)              | 470                                     | 260                                     |
| Athens      | Metro (2013)              | 400                                     | 100                                     |
| Istanbul    | Metro (2007)              | 200                                     | -                                       |
| Sydney      | Train (2015)              | 18                                      | 15                                      |
| Beijing     | Train (2004)              | 108                                     | 37                                      |
| Seoul       | Train (2008)              | 141                                     | 121                                     |
| Los Angeles | Train (2010)              | 16                                      | 14                                      |
| Naples      | Train (2006)              | 37                                      | 17                                      |
